# Supplementary material for: Cobalt doped graphitic carbon nitride as an effective catalyst for peracetic acid to degrade sulfamethoxazole
Source: Royal Society of Chemistry journal article supplement (doi:10.1039/d2ra00821a), 2022-01-01
Supplement: d2ra00821a1.pdf [file d2ra00821a1.pdf]

1

**Supplementary Information for**

2

**Cobalt doped graphitic carbon nitride as an effective catalyst for**

3

**peracetic acid to degrade sulfamethoxazole**

4

Runyu Zhou, Gaofeng Zhou, Yiqing Liu\*, Shixiang Wang, Yongsheng Fu\*

5

*Faculty of Geosciences and Environmental Engineering, Southwest Jiaotong University, Chengdu 611756, China*

6

### 7 **Text S1. Chemicals**

8 Peracetic acid (15% PAA and  $\text{H}_2\text{O}_2/\text{PAA}$  molar ratio = 1.4), hydrogen peroxide  
9 solution (30wt%  $\text{H}_2\text{O}_2$ ), ethanol (EtOH, 99.5%), urea, cobalt nitrate hexahydrate  
10 ( $\text{Co}(\text{NO}_3)_2 \cdot 6\text{H}_2\text{O}$ ), sodium thiosulfate ( $\text{Na}_2\text{S}_2\text{O}_3$ ), sodium hydroxide (NaOH), sulfuric  
11 acid ( $\text{H}_2\text{SO}_4$ ), methanol (MeOH) and tert-butanol (TBA) were purchased from  
12 Chengdu Kelong Chemical Reagent Co. Ltd, China. Sulfamethoxazole (SMX) was  
13 purchased from Aladdin Reagent Company, China. All chemicals were used as received  
14 without further purification. All solutions were prepared using deionized water.

15

### 16 **Text S2. Catalysts synthesis**

17 Cobalt doped g- $\text{C}_3\text{N}_4$  (Co-CN) was synthesized by a facile calcination method.<sup>1</sup>  
18 The detailed synthesis processes are as follows: 10 g urea and 0.2 g  $\text{Co}(\text{NO}_3)_2 \cdot 6\text{H}_2\text{O}$   
19 were mixed into 20 mL deionized water, and then the mixed solution was heated at 80  
20 °C in a water bath until all the water was evaporated. Subsequently, the obtained  
21 product was dried overnight in an oven and then transferred into a crucible with cover  
22 to calcine at 500 °C for 4 h with a heating rate of 2.3 °C  $\text{min}^{-1}$  in a muffle furnace. After  
23 cooling down to room temperature, the prepared product was ground into powder in an  
24 agate mortar and washed with deionized water and ethanol for several times. Finally, it  
25 was dried in vacuum at 80 °C for 6 h, as shown in Fig. S1.

26

### 27 **Text S3. Characterization**

28 The prepared pure g- $\text{C}_3\text{N}_4$ , cobalt oxide, fresh Co-CN and used Co-CN were  
29 characterized by several methods. The X-ray diffraction (XRD) patterns were collected  
30 from a Panalytical Empyrean powder X-ray diffractometer (Ultima IV, PANalytical,  
31 Holland) with a Cu  $\text{K}\alpha$  radiation ( $\lambda = 1.5406$  nm) in the  $2\theta$  range from 10° to 80°. The  
32 surface morphology and element mapping of samples were analyzed by a scanning

33 electron microscope (SEM, ZEISS Gemini 300, Carl Zeiss, Germany) coupled with an  
34 energy diffraction spectrum (EDS, OXFORD Xplore, OXFORD, UK). The specific  
35 surface areas of samples were calculated by Brunauer–Emmett–Teller (BET) method  
36 based on the N<sub>2</sub> adsorption-desorption measurement using a physisorption analyzer  
37 (ASAP2460, Micromeritics, USA). X-ray photoelectron spectroscopy (XPS, Thermo  
38 Scientific K-Alpha, Thermo, USA) was used to investigate the elemental composition  
39 of samples.

40

#### 41 **Text S4. Analysis**

42 SMX concentration was analyzed using a high performance liquid chromatograph  
43 (HPLC, LC-2030, Shimadzu, Japan). The mobile phase was methanol and 0.1% acetic  
44 acid water solution (v/v = 35/65) at a flow rate of 1 mL min<sup>-1</sup>. The column temperature  
45 and the wavelength of UV detector were set at 30 °C and 270 nm, respectively, with  
46 the injection volume of 20 μL. The degradation products of SMX were determined by  
47 an ultra performance liquid chromatograph coupled with a quadrupole time-of-flight  
48 mass spectrometer (UPLC-Q-TOF-MS, Quattro Premier XE, Waters, USA) with a C18  
49 reversed-phase column (50 × 2.1 mm, 1.7 μm). The mobile phase contained A (0.1%  
50 formic acid water solution) and B (acetonitrile) at a flow rate of 0.5 mL min<sup>-1</sup>. The  
51 gradient was 90% A and 10% B for 0.2 min, linearly increasing to 5% A and 95% B in  
52 4.3 min, maintaining for 0.5 min, and then decreasing back to 90% A and 10% B in 2  
53 min.

54

55

56

57

58 Table S1. The weight percentages of C, N and Co in g-C<sub>3</sub>N<sub>4</sub> and Co-CN

| Product                         | Weight percentage (%) |       |       |
|---------------------------------|-----------------------|-------|-------|
|                                 | C                     | N     | Co    |
| g-C <sub>3</sub> N <sub>4</sub> | 39.06                 | 60.94 | /     |
| Co-CN-0.5                       | 38.65                 | 58.97 | 2.38  |
| Co-CN-1                         | 38.86                 | 57.09 | 4.05  |
| Co-CN-1.5                       | 39.61                 | 52.92 | 7.47  |
| Co-CN-2                         | 41.14                 | 50.73 | 8.13  |
| Co-CN-5                         | 31.08                 | 46.39 | 22.53 |

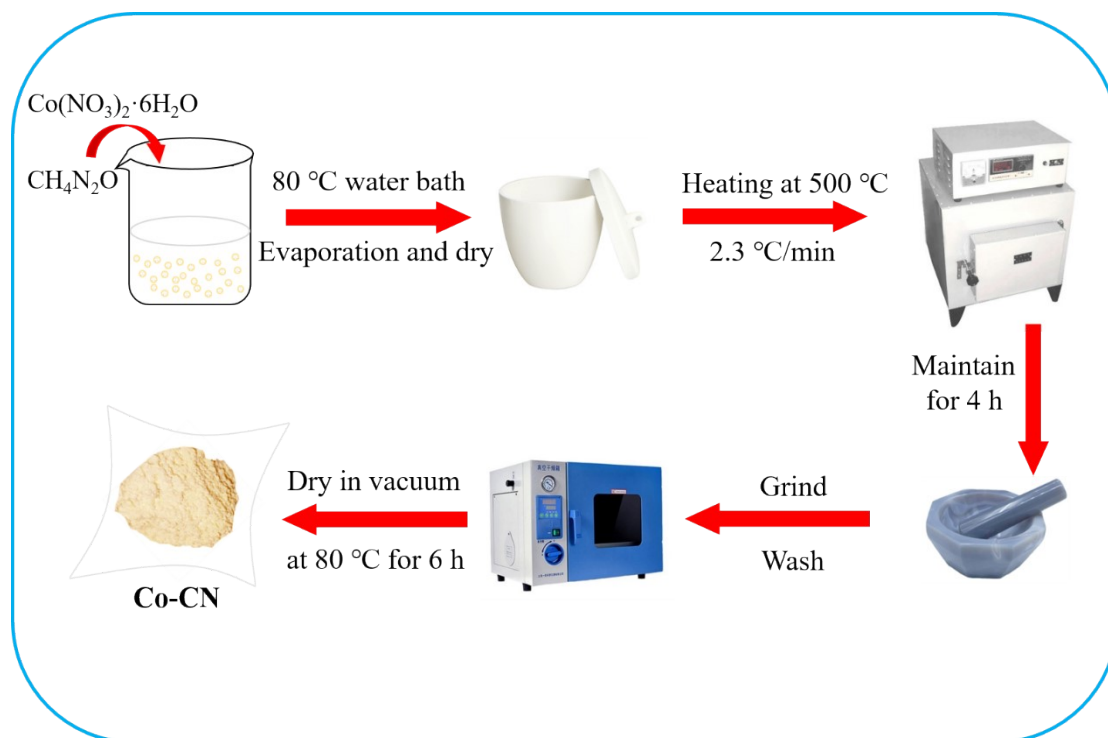

60

61

Fig. S1 The synthesis procedure of Co-CN.

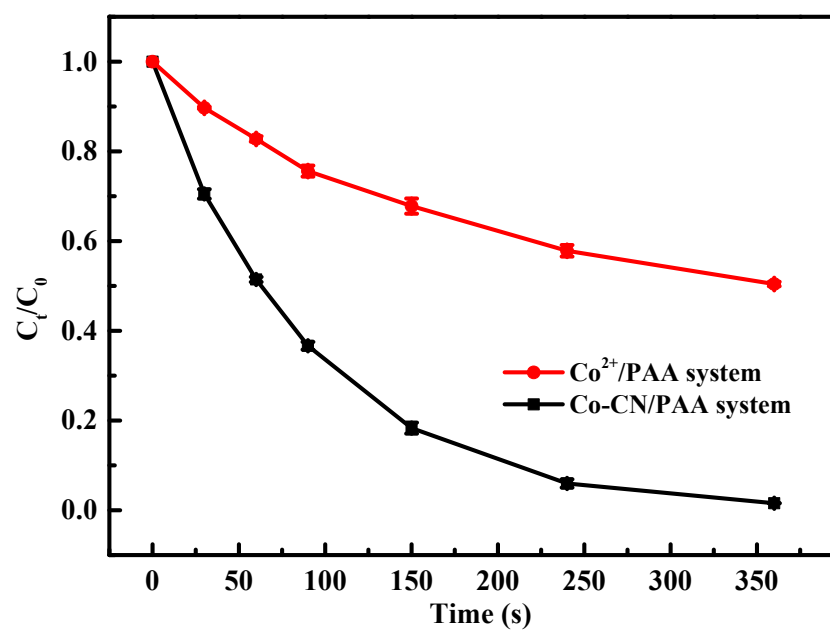

62

63 Fig. S2 SMX degradation by different systems. Experimental conditions:  $[\text{PAA}]_0 = 0.1 \text{ mM}$ ,  
 64  $[\text{Co}^{2+}]_0 = 20 \mu\text{g L}^{-1}$ ,  $[\text{catalyst}]_0 = 50 \text{ mg L}^{-1}$ ,  $[\text{SMX}]_0 = 5 \mu\text{M}$ ,  $\text{pH}_0 = 6.5$ ,  $T = 25 \text{ }^\circ\text{C}$ .

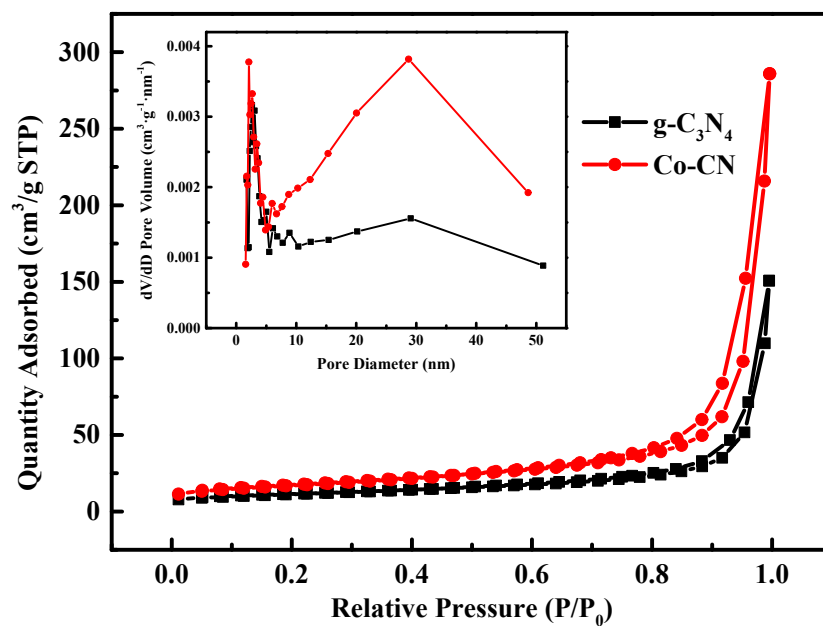

65

66 **Fig. S3**  $N_2$  adsorption–desorption isotherm curves and the corresponding pore-size  
 67 distribution curves obtained by the BJH method.

68

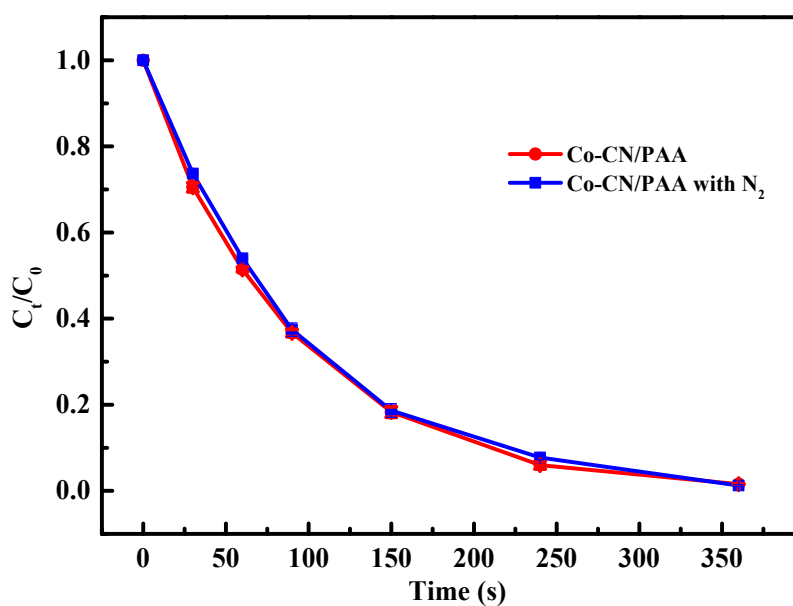

69

70 **Fig. S4** Degradation of SMX in  $\text{Co-CN/PAA}$  system under  $N_2$  atmosphere. Experimental  
 71 conditions:  $[\text{PAA}]_0 = 0.1 \text{ mM}$ ,  $[\text{catalyst}]_0 = 50 \text{ mg L}^{-1}$ ,  $[\text{SMX}]_0 = 5 \text{ }\mu\text{M}$ ,  $\text{pH}_0 = 6.5$ ,  $T = 25 \text{ }^\circ\text{C}$ .

72

73

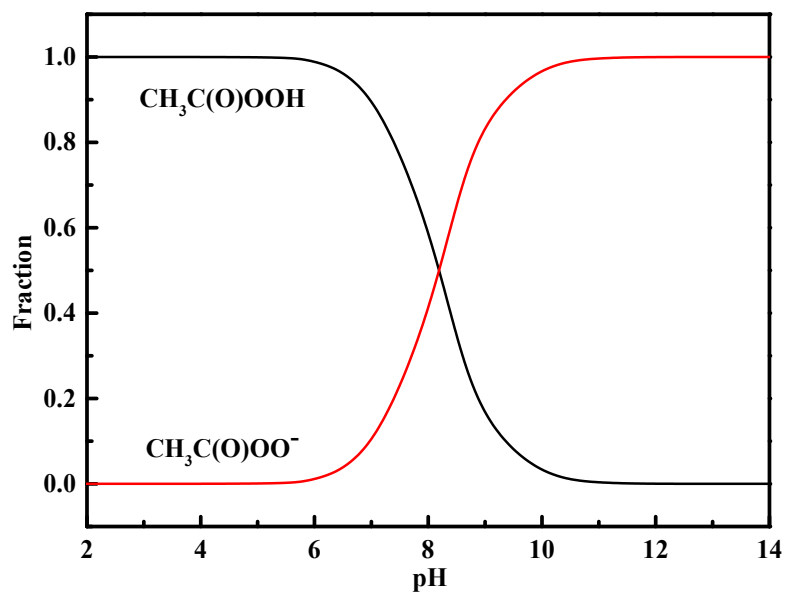

74

75

Fig. S5 Speciation diagram of PAA.

76

#### 77 References

78 1 M. Xie, J. Tang, L. Kong, W. Lu, V. Natarajan, F. Zhu and J. Zhan, Cobalt doped g-  
79  $\text{C}_3\text{N}_4$  activation of peroxymonosulfate for monochlorophenols degradation, *Chem.*  
80 *Eng. J.*, 2019, **360**, 1213-1222.

81
